# Supplementary material for: Resistance Determinants and Their Genetic Context in Enterobacteria from a Longitudinal Study of Pigs Reared under Various Husbandry Conditions
Source: PubMed Central journal article supplement (PMC8091121; doi:10.1128/aem.02612-20), 2021-03-26
Supplement: AEM.02612-20-s0001.pdf [file AEM.02612-20-s0001.pdf]

1                                   **Appendixes for the following article published in the**  
2                                   **Applied and Environmental Microbiology Journal**

3  
4   **Title:** Resistance determinants and their genetic context in enterobacteria from a longitudinal  
5 study of pigs reared under various husbandry conditions

6  
7   **Running title:** Resistance genes and their context in pig production

8  
9   **Authors and Affiliations:** Dominic Poulin-Laprade<sup>1#</sup>, Jean-Simon Brouard<sup>1</sup>, Nathalie Gagnon<sup>1</sup>,  
10 Annie Turcotte<sup>1</sup>, Alexandra Langlois<sup>1</sup>, J. Jacques Matte<sup>1</sup>, Catherine D. Carrillo<sup>2</sup>, Rahat Zaheer<sup>3</sup>,  
11 Tim McAllister<sup>3</sup>, Edward Topp<sup>4</sup>, Guylaine Talbot<sup>1</sup>

12  
13   <sup>1</sup>Sherbrooke Research and Development Centre, Agriculture and Agri-Food Canada

14   <sup>2</sup>Ottawa Research and Development Centre, Canadian Food Inspection Agency

15   <sup>3</sup>Lethbridge Research and Development Centre, Agriculture and Agri-Food Canada

16   <sup>4</sup>London Research and Development Centre, Agriculture and Agri-Food Canada

17  
18   **# Corresponding author:**

19   2000 College Street, Sherbrooke, QC, Canada, J1M 1Z7

20   Phone: 1-819-571-0864

21   E-mail: [Dominic.Poulin-Laprade@canada.ca](mailto:Dominic.Poulin-Laprade@canada.ca)

23 **Abbreviations**

24

25 AMR: antimicrobial resistance

26 ARG: antibiotic resistance genes

27 3GC: third generation cephalosporin

28 ESBL: extended-spectrum beta-lactamase

29 CARD: Comprehensive Antibiotic Resistance Database

30 RGI: Resistance Gene Identifier

31 AF1: organic or antibiotic-free 1

32 AF2: certified-humane or antibiotic-free 2

33 AF3: AGRO-COM or antibiotic-free 3

34 CV: conventional

35 CB: Cary-Blair medium

36 MAC: MacConkey II agar

37 TSB: Tryptic soy broth

38 EC: *Escherichia coli* broth

39 0.1% PW: 0.1% peptone water

40 2% BPW: 2% buffered peptone water

41 CFU: Colony forming unit(s)

42 AMP: ampicillin

43 AUG: augmentin (amoxicillin-clavulanic acid)

44 TZP: piperacillin-tazobactam

45 FAZ: cefazolin

46 CEP: cephalothin

47 CTX: cefotaxime

48 POD: cefpodoxime

49 TAZ: ceftazidime

50 CRO: ceftriaxone

51 FTC: cefotaxime-clavulanic acid

52 CCV: ceftazidime-clavulanic acid

- 53 FEP: cefepime
- 54 FOX: cefoxitin
- 55 IMP: imipenem
- 56 MER: meropenem
- 57 ETP: ertapenem
- 58 SUL: sulfisoxazole
- 59 SXT: trimethoprim-sulfamethoxazole
- 60 TET: tetracycline
- 61 GEN: gentamicin
- 62 STR: streptomycin
- 63 AZI: azithromycin
- 64 CIP: ciprofloxacin
- 65 NAL: nalidixic acid
- 66 CHL: chloramphenicol
- 67

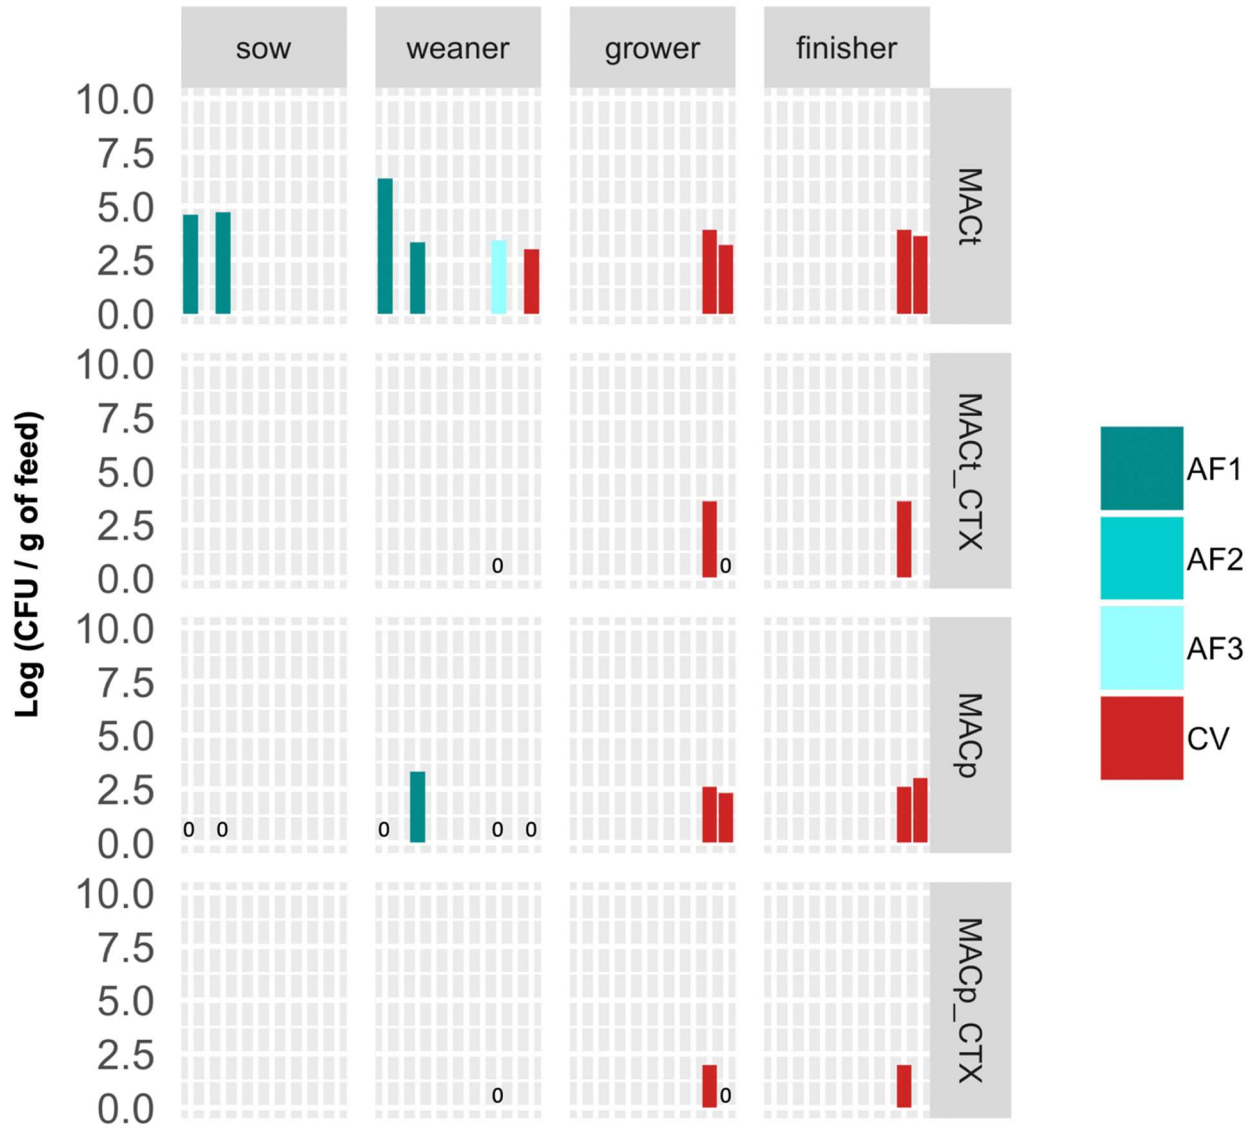

68

69

70 **FIG S1** Antibiotic resistance levels in feed. Bacterial counts of pink (MACp) or total (MACT; pink  
 71 + white) colony forming units (CFU) per gram of feed sample. The bars represent the log  
 72 transformations of CFU on MacConkey II agar plates supplemented or not with cefotaxime  
 73 (MACT\_CTX, MACr\_CTX). Plates devoid of CFU are indicated by a 0, while the missing data is  
 74 due to missing feed samples.

75



84  
85

sample\_type=feces

| animal_type | AF3-3 | AF3-4 | CV1   | CV2   | AF1-1 | AF1-3 | AF2-1 | AF2-2 |
|-------------|-------|-------|-------|-------|-------|-------|-------|-------|
| sow         | 0.798 | 0.873 | 0.346 | 0.526 | 0.995 | 0.547 | 0.978 | 0.896 |
| suckler     | 0.855 | 0.921 | 0.333 | 0.451 | 0.995 | 0.899 | 0.986 | 0.901 |
| weaner      | 0.747 | 0.767 | 0.000 | 0.143 | 0.916 | 1.000 | 0.921 | 0.910 |
| grower      | 0.830 | 0.759 | 0.595 | 0.305 | 0.915 | 0.875 | 0.789 | 0.850 |
| finisher    | 0.811 | 0.824 | 0.719 | 0.995 | 0.837 | 0.735 | 0.975 | 0.935 |

86  
87  
88  
89

sample\_type=feed

| animal_type | AF3-3 | AF3-4 | CV1   | CV2   | AF1-1 | AF1-3 | AF2-1 | AF2-2 |
|-------------|-------|-------|-------|-------|-------|-------|-------|-------|
| sow         | .     | .     | 0.000 | .     | 0.738 | 0.000 | 0.083 | 0.422 |
| weaner      | 0.713 | .     | 0.000 | 0.848 | 0.692 | 0.675 | .     | 0.286 |
| grower      | .     | .     | 0.000 | 0.292 | 0.556 | 0.625 | .     | .     |
| finisher    | .     | .     | 0.900 | 0.933 | 1.000 | 1.000 | .     | .     |

90  
91  
92  
93

sample\_type=manure

| animal_type | AF3-3_4 | CV-1  | CV-2  | AF1-1 | AF1-3 | AF2-1 | AF2-2 |
|-------------|---------|-------|-------|-------|-------|-------|-------|
| sow         | 0.615   | .     | 0.663 | 1.000 | 0.942 | 0.981 | 0.846 |
| weaner      | .       | 0.333 | 0.869 | 0.902 | 0.925 | 0.877 | 0.955 |
| grower      | 1.000   | 0.870 | .     | 0.884 | 0.858 | 0.780 | 0.718 |
| finisher    | 0.800   | 0.500 | .     | 0.842 | 0.667 | 0.929 | .     |

94

95 **FIG S3** Conventional animals carry fewer cephalosporin-resistant *Enterobacteriaceae* than  
96 antibiotic-free animals based on the ~10 000 isolates collection. Heat map showing hotspots of  
97 CTX and CRO resistant isolates in the experimental set-up. The colour code is as follows: the  
98 more resistant, the redder (values between 0.51 and 1); grey, no change (value of 0.5); the less  
99 resistant, the greener (values between 0 and 0.49). Dots represent missing data.

100

101

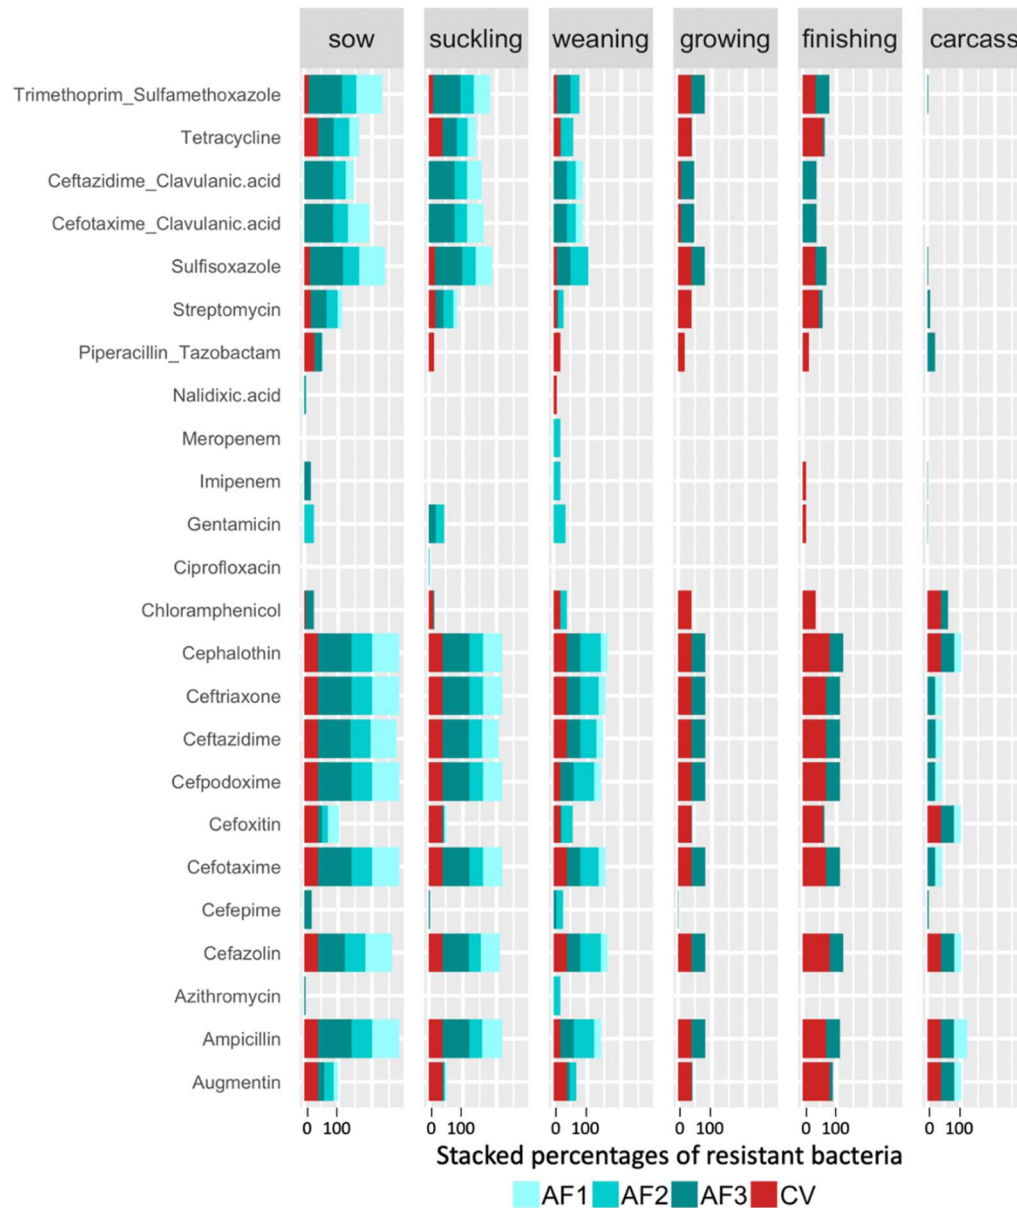

102

103 **FIG S4** Antibiotic susceptibility testing of porcine CTX-resistant isolates. Antibiotic susceptibility  
 104 testing on 300 isolates resistant to CTX from feces, manures and carcass swabs for 24 antibiotics  
 105 using automated microbroth dilution. MIC results were interpreted based on clinical breakpoints  
 106 according to CLSI M100 (1). The resistant, intermediate, and considered ESBL phenotypic results  
 107 were converted to 1, and susceptible, dose dependent and no interpretation results were converted  
 108 to 0. The bars represent stacked percentages of means for the four husbandries.

109 **TABLE S1.** Methodology and results associated with the phenotype-genotype concordance  
110 calculations. See joined Excel spreadsheet TableS1.

111

112 **TABLE S2.** Detailed report of carbapenemase activity using the mCIM method. See joined  
113 Excel spreadsheet TableS2.

114

115



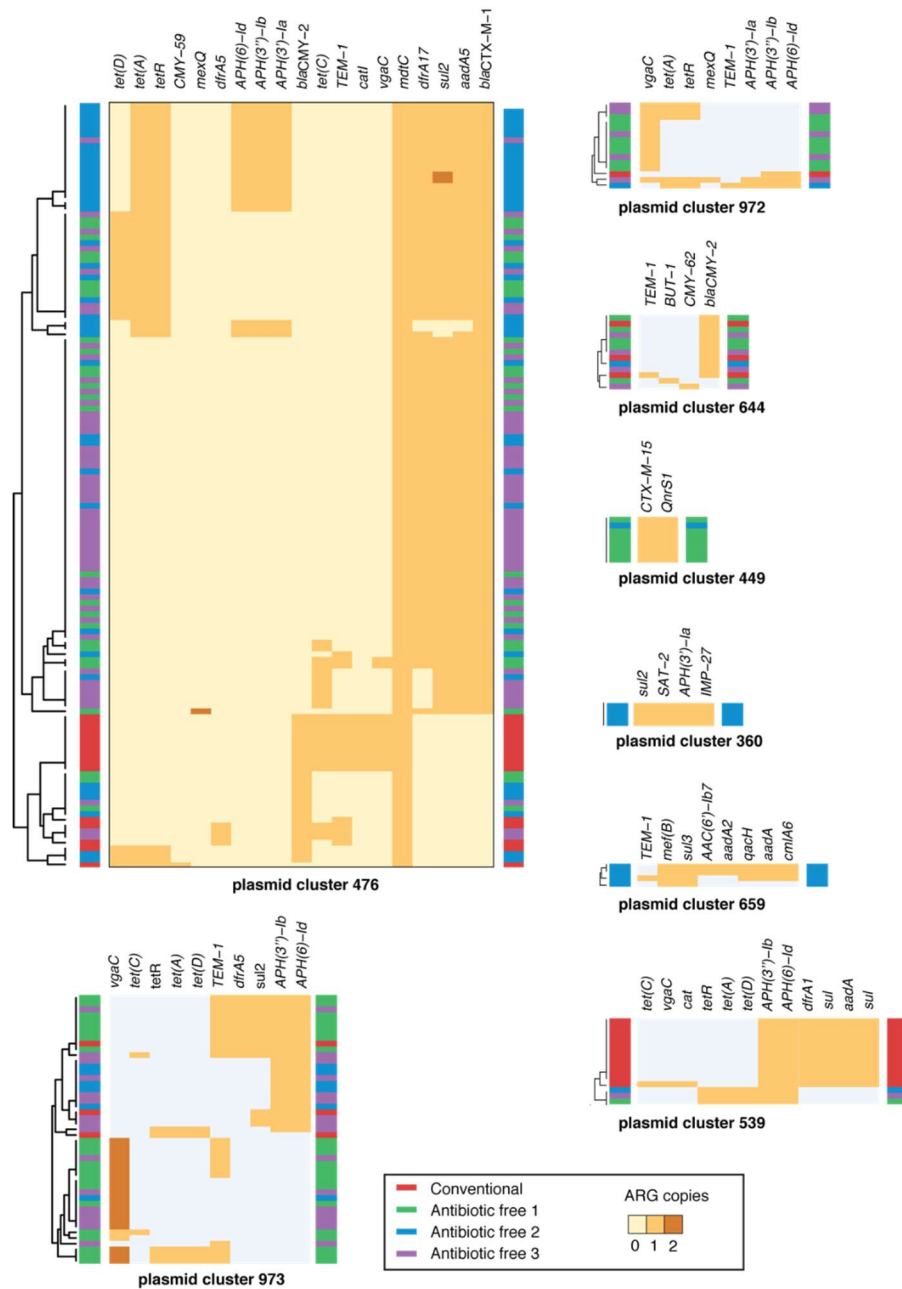

116

117 **FIG S5** Heat maps of ARG located on the main ARG-encoding plasmid clusters. The ARG  
 118 names are indicated on top, while the husbandry group of each isolate is indicated by colours on  
 119 both sides of the heat map. The heatmap.2 function from the ggplot2 R package with the default  
 120 clustering method (complete linkage method with Euclidean distance measure) was used for  
 121 clustering data and producing heat maps.

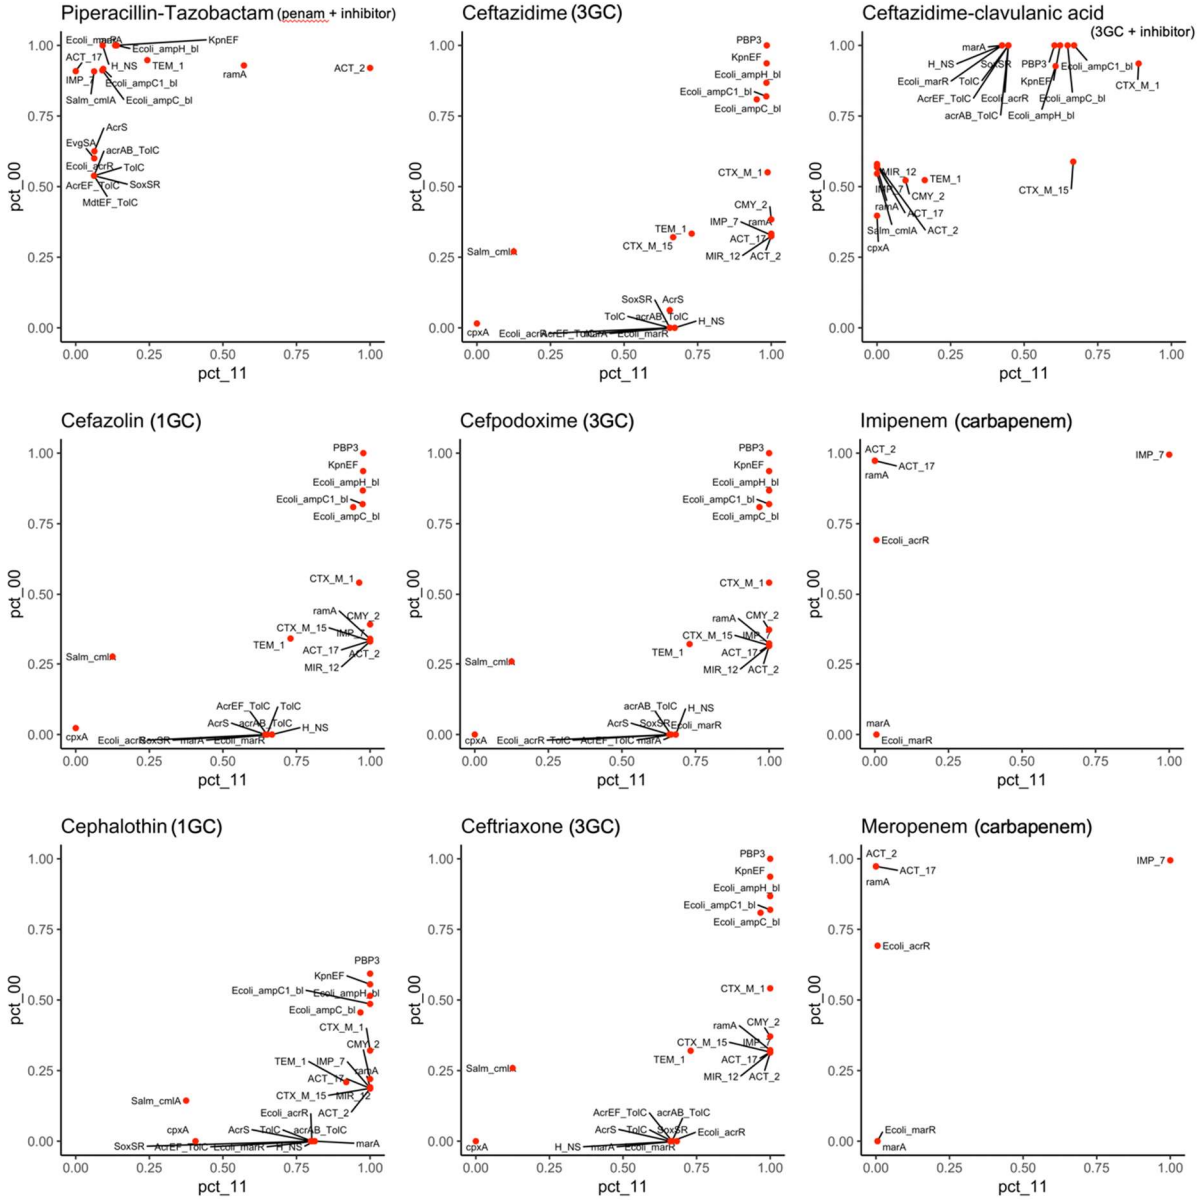

122

123 **FIG S6** Concordance between the resistome and the resistance observed by antibiotic  
 124 susceptibility testing of isolates. The dots represent individual genes and their position is at the  
 125 intersection of the percentage of susceptible isolates without the gene (pct\_00) and the  
 126 percentage of resistant isolates with the gene (pct\_11). The antibiotics tested and the associated  
 127 antibiotic classes are indicated on top of the graphs. Detailed descriptions of the genes  
 128 located in Table S1 (continued on the next page).

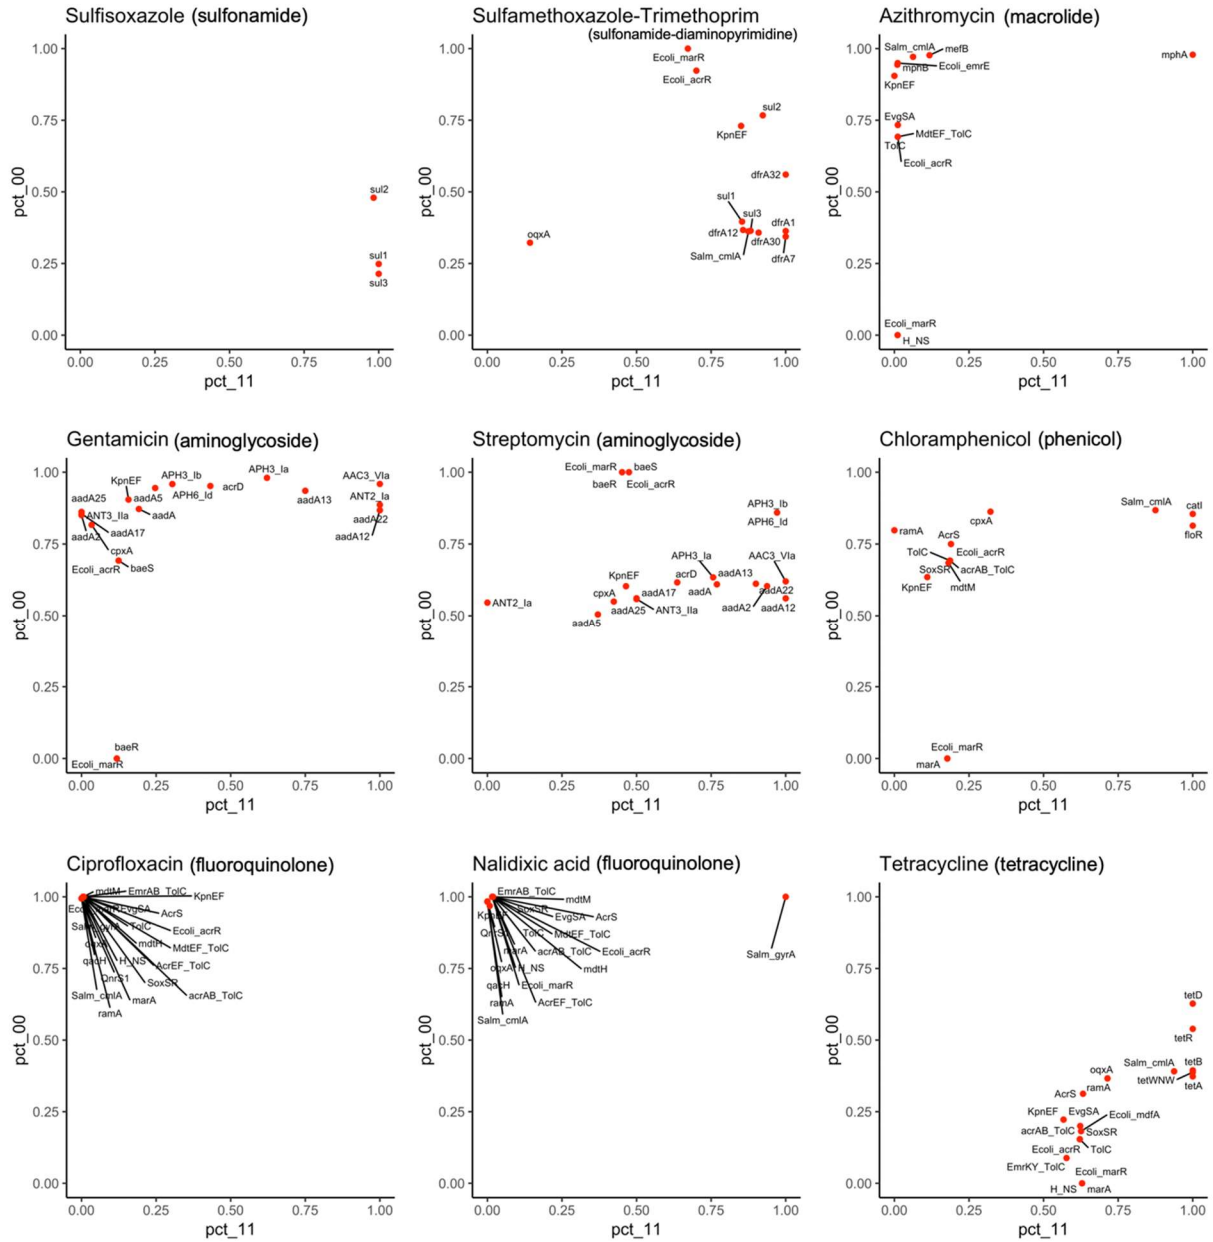

129

130 **FIG S6 (suite)** Concordance between the resistance and the resistance observed by antibiotic  
 131 susceptibility testing of isolates. The dots represent individual genes and their position is at the  
 132 intersection between the percentage of susceptible isolates without the gene (pct\_00) and the  
 133 percentage of resistant isolates with the gene (pct\_11). The antibiotics tested and the associated  
 134 antibiotic classes are indicated on top of the graphs. Detailed descriptions of the genes are  
 135 located in the Table S1.

136 **TABLE S3.** Detailed report of the plasmids in the studied bacterial isolates and transconjugants.

137 See joined Excel spreadsheet TableS3.

138

**TABLE S4** Plasmid groups identified in this study (2).

| Rep_type                               | MobSuite plasmid clusters | n   | Median length (bp) | Relaxase type(s) | Mpf type | Predicted mobility <sup>1</sup> | AMR genes <sup>2</sup>                                                                                                                                                                                        |
|----------------------------------------|---------------------------|-----|--------------------|------------------|----------|---------------------------------|---------------------------------------------------------------------------------------------------------------------------------------------------------------------------------------------------------------|
| IncA/C2                                | 960, 966                  | 2   | 146,622            | MOBH             | MPF_F    | C                               |                                                                                                                                                                                                               |
| IncI1                                  | 476                       | 129 | 113,296            | MOBP             | MPF_I    | C                               | <i>aadA5</i> , APH(3'')-Ib, APH(3')-Ia, APH(6)-Id, CMY-2, CTX-M-1, TEM-1, <i>catI</i> , <i>tet(A)</i> , <i>tet(C)</i> , <i>tet(D)</i> , <i>tetR</i> , <i>mdtC</i> , <i>mexQ</i> , <i>sul2</i> , <i>dfrA17</i> |
| IncI1                                  | 473, 487                  | 5   | 90,277             | MOBP             | MPF_I    | C, N                            | <i>aadA</i> , <i>sul1</i>                                                                                                                                                                                     |
| IncI2                                  | 644, novel                | 18  | 63,833             | MOBP             | MPF_T    | C, N                            | BUT-1, CMY-2                                                                                                                                                                                                  |
| IncN                                   | 934                       | 5   | 45,990             | MOBF             | MPF_T    | C, N                            |                                                                                                                                                                                                               |
| IncQ1                                  | 361                       | 2   | 4,967              | -                | -        | N                               |                                                                                                                                                                                                               |
| IncX4                                  | 585, 586                  | 2   | 33,875             | MOBP             | MPF_T    | C                               |                                                                                                                                                                                                               |
| IncI3                                  | 839                       | 6   | 2,113              | -                | -        | N                               |                                                                                                                                                                                                               |
| IncFIB, IncFIA, IncFII, IncFIIA, IncY  | 972                       | 16  | 95,196             | MOBF, MOBP       | MPF_F    | C, M, N                         | <i>vgaC</i> , APH(3'')-Ib, APH(3')-Ia, APH(6)-Id, TEM-1, <i>tet(A)</i> , <i>tetR</i>                                                                                                                          |
| IncFIA, IncFIB, IncFII, IncFIIA, IncQ1 | 973                       | 52  | 144,160            | MOBF, MOBP       | MPF_F    | C, M, N                         | <i>vgaC</i> , APH(3'')-Ib, APH(3')-Ia, APH(6)-Id, TEM-1, <i>tet(A)</i> , <i>tet(D)</i> , <i>tetR</i> , <i>sul2</i> , <i>dfrA5</i>                                                                             |
| IncFII, IncFIIA, IncQ1, IncFIB         | 539                       | 24  | 104,493            | MOBF, MOBP       | MPF_F    | C, N                            | <i>aadA</i> , APH(3'')-Ib, APH(6)-Id, <i>tet(A)</i> , <i>tet(D)</i> , <i>tetR</i>                                                                                                                             |
| IncFIA                                 | novel                     | 13  | 14,172             | -                | -        | N                               |                                                                                                                                                                                                               |
| IncFIIA                                | 489                       | 1   | 88,588             | MOBP             | MPF_I    | C                               | CMY-2                                                                                                                                                                                                         |
| IncFIB                                 | 87, 539, 553, 969, novel  | 48  | 12,427             | -                | -        | N, M                            |                                                                                                                                                                                                               |
| IncR                                   | 729, 730, 731, novel      | 14  | 27,761             | MOBF, MOBP       | MPF_T    | C, M, N                         | APH(3'')-Ib, APH(6)-Id, <i>tet(A)</i> , <i>tet(D)</i> , <i>tetR</i>                                                                                                                                           |
| IncH, IncY                             | 1009, novel               | 45  | 83,694             | -                | -        | Non-mobilizable                 | AAC(3)-Vi, <i>aaadA</i> , <i>sul1</i> , <i>sul2</i> , <i>dfrA17</i> , <i>vgaC</i>                                                                                                                             |

141 **TABLE S4** Plasmids groups identified in this study (continued).

| Rep_type                 | MobSuite plasmid clusters                                           | n       | Median length (bp) | Relaxase type(s) | Mpf type | Predicted mobility <sup>1</sup> | AMR genes                                                                                        |
|--------------------------|---------------------------------------------------------------------|---------|--------------------|------------------|----------|---------------------------------|--------------------------------------------------------------------------------------------------|
| IncX1                    | 39, 46, 47, 55, 55, 825, novel                                      | 68      | 37,904             | MOBP             | MPF_T    | C, N                            | -                                                                                                |
| ColRNAI rep cluster 1291 | 229, 509, 834                                                       | 27      | 5,463              | MOBQ             |          | M                               | -                                                                                                |
| ColRNAI rep cluster 1857 | 14, 17, 18, 19, 22, 23, 26, 29, 32, 33, 34, 35, 259, 292, 305, 1071 | 17<br>6 | 4,604              | MOBF, MOBP       | -        | M                               | -                                                                                                |
| ColRNAI rep cluster 1885 | 414, 424, novel                                                     | 37      | 1,549              | -                | -        | M, N                            | -                                                                                                |
| ColRNAI rep cluster 1987 | 3, 5, 106, 132, 155, novel                                          | 24      | 5,169              | MOBF, MOBP       | -        | M                               | -                                                                                                |
| ColRNAI rep cluster 1993 | novel                                                               | 1       | 1,943              | -                | -        | N                               | -                                                                                                |
| Rep cluster 48           | novel                                                               | 2       | 244,618            | -                | -        | N                               | -                                                                                                |
| Rep cluster 312          | 497                                                                 | 1       | 27,727             | MOBP             | MPF_T    | C                               | -                                                                                                |
| Rep cluster 488          | 920                                                                 | 22      | 108,882            | -                | -        | N                               | -                                                                                                |
| Rep cluster 1527         | novel                                                               | 1       | 45,271             | -                | -        | N                               | -                                                                                                |
| Rep cluster 1778         | 465, 471                                                            | 16      | 4,067              | MOBQ             | -        | M                               | -                                                                                                |
| Rep cluster 1785         | 469                                                                 | 2       | 4,073              | MOBQ             | -        | M                               | -                                                                                                |
| -                        | 2087                                                                | 2       | 9,496              | -                | -        | N                               | APH(3'')-Ib, APH(3')-Ia, APH(6)-Id, CMY-2                                                        |
| -                        | 449                                                                 | 7       | 16,977             | -                | -        | N                               | CTX-M-15, <i>qnrS1</i>                                                                           |
| -                        | 659                                                                 | 4       | 9,418              | -                | -        | N                               | AAC(6')-Ib7, <i>aadA</i> , <i>aadA2</i> , <i>cmlA6</i> , <i>mefB</i> , <i>qacH</i> , <i>sul3</i> |
| -                        | 1068                                                                | 55      | 13,224             | -                | -        | N                               | -                                                                                                |
| IncFIIA, IncFII, IncF IB | 1561                                                                | 18      | 67,128             | MOBF             |          |                                 | -                                                                                                |
| -                        | 2911, 2912                                                          | 29      | 25,170             | -                | -        | N                               | -                                                                                                |
| -                        | 540, 541, 542                                                       | 19      | 51,956             | MOBF, MOBP       | MPF_F    | C, N                            | -                                                                                                |

142 <sup>1</sup> C: Conjugative, N: Non-mobilisable, M: Mobilisable

143 <sup>2</sup> The antibiotic resistance genes identified by RGI (3) and harbored in the plasmid groups

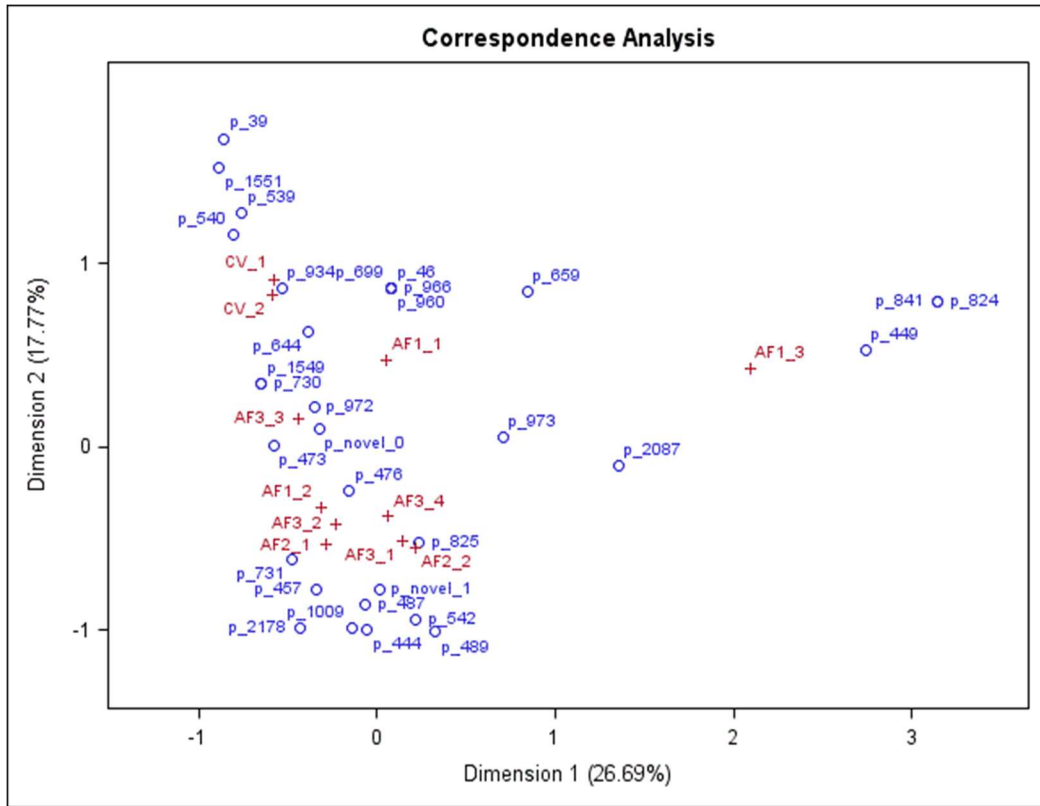

144

145

146 **FIG S7** Plasmids and ARG. A) Correspondence analysis on the matrix of 27 plasmids found in  
 147 feces samples. Circles represent plasmid clusters while plus signs indicate animal groups.

148





158 **TABLE S5** Description of the animals sampled at each production stage.

| Husbandry                                                  | Group | Sow <sup>1</sup> | Suckling | Weaning | Growing | Finishing | Carcass |
|------------------------------------------------------------|-------|------------------|----------|---------|---------|-----------|---------|
| Number of animals per group                                |       |                  |          |         |         |           |         |
| AF1                                                        | AF1-1 | 7                | 31       | 31      | 28      | 24        | 31      |
|                                                            | AF1-2 | 7                | 29       | -       | -       | -         | -       |
|                                                            | AF1-3 | 7                | 30       | 24      | 26      | 22        | 30      |
| AF2                                                        | AF2-1 | 7                | 28       | 29      | 27      | 8         | 18      |
|                                                            | AF2-2 | 7                | 30       | 34      | 27      | 11        | 22      |
| AF3                                                        | AF3-1 | 7                | 34       | 32      | -       | -         | -       |
|                                                            | AF3-2 | 7                | 32       | 32      | -       | -         | -       |
|                                                            | AF3-3 | 7                | 32       | 27      | 35      | 30        | 38      |
|                                                            | AF3-4 | 7                | 33       | 25      | 35      | 33        | 29      |
| CV                                                         | CV-1  | 7                | 32       | 29      | 33      | 33        | 27      |
|                                                            | CV-2  | 8                | 32       | 32      | 27      | 23        | 30      |
| Days of lactation (sows) or age (piglets-pigs) at sampling |       |                  |          |         |         |           |         |
| AF1                                                        | AF1-1 | 14               | 14       | 35      | 84      | 182       | 189     |
|                                                            | AF1-2 | 14               | 14       | -       | -       | -         | -       |
|                                                            | AF1-3 | 14               | 14       | 35      | 84      | 182       | 189     |
| AF2                                                        | AF2-1 | 14               | 14       | 35      | 84      | 182       | 189     |
|                                                            | AF2-2 | 14               | 14       | 35      | 84      | 182       | 189     |
| AF3                                                        | AF3-1 | 14               | 14       | 28      | -       | -         | -       |
|                                                            | AF3-2 | 14               | 14       | 28      | -       | -         | -       |
|                                                            | AF3-3 | 14               | 14       | 28      | 84      | 161       | 168     |
|                                                            | AF3-4 | 14               | 14       | 28      | 84      | 161       | 168     |
| CV                                                         | CV-1  | 14               | 14       | 28      | 84      | 161       | 168     |
|                                                            | CV-2  | 14               | 14       | 28      | 84      | 161       | 168     |
| Farm location <sup>2</sup>                                 |       |                  |          |         |         |           |         |
| AF1                                                        | AF1-1 | A                | A        | C       | C       | C         | U       |
|                                                            | AF1-2 | B                | B        | -       | -       | -         | -       |
|                                                            | AF1-3 | A                | A        | D       | D       | D         | U       |
| AF2                                                        | AF2-1 | E                | E        | G       | G       | I         | U       |
|                                                            | AF2-2 | F                | F        | H       | H       | I         | U       |
| AF3                                                        | AF3-1 | J                | J        | L       | -       | -         | -       |
|                                                            | AF3-2 | K                | K        | M       | -       | -         | -       |
|                                                            | AF3-3 | K                | K        | N       | O       | P         | U       |
|                                                            | AF3-4 | K                | K        | N       | O       | P         | U       |
| CV                                                         | CV-1  | Q                | Q        | R       | S       | S         | U       |
|                                                            | CV-2  | Q                | Q        | R       | T       | T         | U       |

159 <sup>1</sup>Sows were at their 3<sup>rd</sup> parity except for sows of the AF1-2 group and one sow of the CV-1 group that  
160 were at their 2<sup>nd</sup> parity.

161 <sup>2</sup>A capital letter was attributed to each distinct location where the animals were housed. Location U was  
162 the abattoir.

163

164 **TABLE S6** Distribution of isolates for each characterisation method.

| Husbandry                                                                  | Group | Sow | Suckling | Weaning | Growing | Finishing | Manure | Carcass | Feed |
|----------------------------------------------------------------------------|-------|-----|----------|---------|---------|-----------|--------|---------|------|
| Number of isolates phenotyped by Sensititre™ automated microbroth dilution |       |     |          |         |         |           |        |         |      |
| AF1                                                                        | AF1-1 | -   | 1        | 5       | -       | 5         | 1      | 1       | -    |
|                                                                            | AF1-2 | 9   | 7        | -       | -       | -         | -      | -       | -    |
|                                                                            | AF1-3 | 1   | 7        | 1       | -       | -         | 6      | 1       | -    |
| AF2                                                                        | AF2-1 | 10  | 11       | 7       | -       | -         | 5      | -       | -    |
|                                                                            | AF2-2 | 5   | 7        | -       | -       | 5         | 7      | -       | -    |
| AF3                                                                        | AF3-1 | 11  | 1        | -       | -       | -         | 1      | -       | -    |
|                                                                            | AF3-2 | -   | 10       | -       | -       | -         | 1      | -       | -    |
|                                                                            | AF3-3 | 13  | 10       | 17      | 15      | 11        | -      | 7       | -    |
|                                                                            | AF3-4 | 10  | 12       | 12      | 10      | 13        | -      | 10      | -    |
| CV                                                                         | CV-1  | 8   | 5        | -       | 7       | 21        | -      | 1       | 2    |
|                                                                            | CV-2  | 6   | 7        | 6       | 8       | 12        | -      | 7       | 3    |
| Number of whole genomes sequenced with Illumina Miseq                      |       |     |          |         |         |           |        |         |      |
| AF1                                                                        | AF1-1 | 4   | 6        | 8       | 5       | 9         | 1      | 1       | -    |
|                                                                            | AF1-2 | 10  | 7        | -       | -       | -         | -      | -       | -    |
|                                                                            | AF1-3 | 1   | 7        | 4       | 2       | 3         | 6      | 1       | -    |
| AF2                                                                        | AF2-1 | 8   | 11       | 8       | 4       | 2         | 5      | -       | -    |
|                                                                            | AF2-2 | 9   | 9        | 2       | 3       | 7         | 6      | -       | -    |
| AF3                                                                        | AF3-1 | 10  | 6        | -       | -       | -         | -      | -       | -    |
|                                                                            | AF3-2 | 4   | 10       | 1       | -       | -         | 1      | -       | -    |
|                                                                            | AF3-3 | 4   | 3        | 8       | 4       | 4         | -      | 6       | -    |
|                                                                            | AF3-4 | 4   | 4        | 3       | 3       | 8         | -      | 10      | -    |
| CV                                                                         | CV-1  | 10  | 7        | -       | 3       | 10        | -      | 4       | -    |
|                                                                            | CV-2  | 4   | 2        | 7       | 3       | 2         | -      | 9       | -    |
| Number of whole genomes sequenced with Oxford Nanopore MinION              |       |     |          |         |         |           |        |         |      |
| AF1                                                                        | AF1-1 | -   | 1        | -       | -       | -         | -      | 1       | -    |
|                                                                            | AF1-2 | 4   | 5        | -       | -       | -         | -      | -       | -    |
|                                                                            | AF1-3 | -   | 5        | -       | -       | -         | -      | 1       | -    |
| AF2                                                                        | AF2-1 | 3   | 3        | 2       | -       | -         | -      | -       | -    |
|                                                                            | AF2-2 | 1   | 5        | 1       | -       | -         | -      | -       | -    |
| AF3                                                                        | AF3-1 | 1   | 1        | -       | -       | -         | -      | -       | -    |
|                                                                            | AF3-2 | -   | 3        | -       | -       | -         | -      | -       | -    |
|                                                                            | AF3-3 | -   | -        | -       | -       | -         | -      | 1       | -    |
|                                                                            | AF3-4 | -   | -        | -       | -       | -         | -      | -       | -    |
| CV                                                                         | CV-1  | -   | 2        | -       | -       | -         | -      | -       | -    |
|                                                                            | CV-2  | -   | -        | -       | -       | -         | -      | -       | -    |

166 **TABLE S6** Distribution of isolates for each characterisation method (continued).

| <b>Husbandry</b>                                   | <b>Group</b> | <b>Sow</b> | <b>Suckling</b> | <b>Weaning</b> | <b>Growing</b> | <b>Finishing</b> | <b>Manure</b> | <b>Swab</b> | <b>Feed</b> |
|----------------------------------------------------|--------------|------------|-----------------|----------------|----------------|------------------|---------------|-------------|-------------|
| Number of isolates tested as donor by conjugation. |              |            |                 |                |                |                  |               |             |             |
| AF1                                                | AF1-1        | -          | 1               | -              | -              | -                | -             | 1           | -           |
|                                                    | AF1-2        | 4          | 5               | -              | -              | -                | -             | -           | -           |
|                                                    | AF1-3        | -          | 5               | -              | -              | -                | -             | 1           | -           |
| AF2                                                | AF2-1        | 3          | 3               | 3              | -              | -                | 1             | -           | -           |
|                                                    | AF2-2        | -          | 2               | -              | -              | -                | -             | -           | -           |
| AF3                                                | AF3-1        | 2          | 1               | -              | -              | -                | -             | -           | -           |
|                                                    | AF3-2        | -          | 2               | -              | -              | -                | -             | -           | -           |
|                                                    | AF3-3        | -          | -               | -              | -              | -                | -             | 2           | -           |
|                                                    | AF3-4        | -          | -               | -              | -              | -                | -             | -           | -           |
| CV                                                 | CV-1         | 1          | 5               | -              | -              | 1                | -             | -           | -           |
|                                                    | CV-2         | -          | -               | -              | -              | -                | -             | -           | -           |

167

168 **TABLE S7.** Isolates and sequencing technical data. See joined Excel spreadsheet named  
169 TableS7.

170

171 **References**

172

- 173 1. CLSI. 2019. Performance Standards for Antimicrobial Susceptibility Testing. 29th ed.  
174 CLSI supplement M100. Clinical and Laboratory Standards Institute, Wayne, PA.
- 175 2. Robertson J, Nash JHE. 2018. MOB-suite: software tools for clustering, reconstruction  
176 and typing of plasmids from draft assemblies. *Microb Genom* 4:e000206.
- 177 3. Alcock BP, Raphenya AR, Lau TTY, Tsang KK, Bouchard M, Edalatmand A, Huynh W,  
178 Nguyen AV, Cheng AA, Liu S, Min SY, Miroshnichenko A, Tran HK, Werfalli RE,  
179 Nasir JA, Oloni M, Speicher DJ, Florescu A, Singh B, Faltyn M, Hernandez-  
180 Koutoucheva A, Sharma AN, Bordeleau E, Pawlowski AC, Zubyk HL, Dooley D,  
181 Griffiths E, Maguire F, Winsor GL, Beiko RG, Brinkman FSL, Hsiao WWL, Domselaar  
182 GV, McArthur AG. 2020. CARD 2020: antibiotic resistome surveillance with the  
183 comprehensive antibiotic resistance database. *Nucleic Acids Res* 48:D517-D525.
- 184
